# Supplementary material
Source: publisher figshare collection journal article supplement (https://frontiersin.figshare.com/ndownloader/files/24371570)
Supplement: Supplementary file [file 24371570]

## Raw survival data for Figure 5C

[illegible]

|    |  |  |  |  |   |    |    |    |
|----|--|--|--|--|---|----|----|----|
| 40 |  |  |  |  | 0 |    |    |    |
| 40 |  |  |  |  | 0 |    |    |    |
| 20 |  |  |  |  |   | -1 |    |    |
| 27 |  |  |  |  |   | -1 |    |    |
| 40 |  |  |  |  |   | 0  |    |    |
| 40 |  |  |  |  |   | 0  |    |    |
| 40 |  |  |  |  |   | 0  |    |    |
| 40 |  |  |  |  |   | 0  |    |    |
| 40 |  |  |  |  |   | 0  |    |    |
| 40 |  |  |  |  |   | 0  |    |    |
| 40 |  |  |  |  |   | 0  |    |    |
| 40 |  |  |  |  |   | 0  |    |    |
| 20 |  |  |  |  |   |    | -1 |    |
| 27 |  |  |  |  |   |    | -1 |    |
| 40 |  |  |  |  |   |    | 0  |    |
| 40 |  |  |  |  |   |    | 0  |    |
| 40 |  |  |  |  |   |    | 0  |    |
| 40 |  |  |  |  |   |    | 0  |    |
| 40 |  |  |  |  |   |    | 0  |    |
| 40 |  |  |  |  |   |    | 0  |    |
| 40 |  |  |  |  |   |    | 0  |    |
| 40 |  |  |  |  |   |    | 0  |    |
| 40 |  |  |  |  |   |    | 0  |    |
| 40 |  |  |  |  |   |    | 0  |    |
| 40 |  |  |  |  |   |    |    | 0  |
| 40 |  |  |  |  |   |    |    | 0  |
| 40 |  |  |  |  |   |    |    | 0  |
| 31 |  |  |  |  |   |    |    | -1 |
| 40 |  |  |  |  |   |    |    | 0  |
| 40 |  |  |  |  |   |    |    | 0  |
| 40 |  |  |  |  |   |    |    | 0  |
| 40 |  |  |  |  |   |    |    | 0  |
| 40 |  |  |  |  |   |    |    | 0  |
| 40 |  |  |  |  |   |    |    | 0  |
| 40 |  |  |  |  |   |    |    | 0  |

**Table 2.** The raw mice survival data shown above corresponds to Figure 5C. The negative values are indicative of when mice reach the endpoint of the study.
